# Supplementary material
Source: PubMed Central journal article supplement (PMC8687746)
Supplement: mmc1.pdf [file mmc1.pdf]

**Cell Reports, Volume 38**

**Supplemental information**

**High-titer neutralization of Mu and C.1.2**

**SARS-CoV-2 variants by vaccine-elicited**

**antibodies of previously infected individuals**

**Takuya Tada, Hao Zhou, Belinda M. Dcosta, Marie I. Samanovic, Amber Cornelius, Ramin S. Herati, Mark J. Mulligan, and Nathaniel R. Landau**

**A**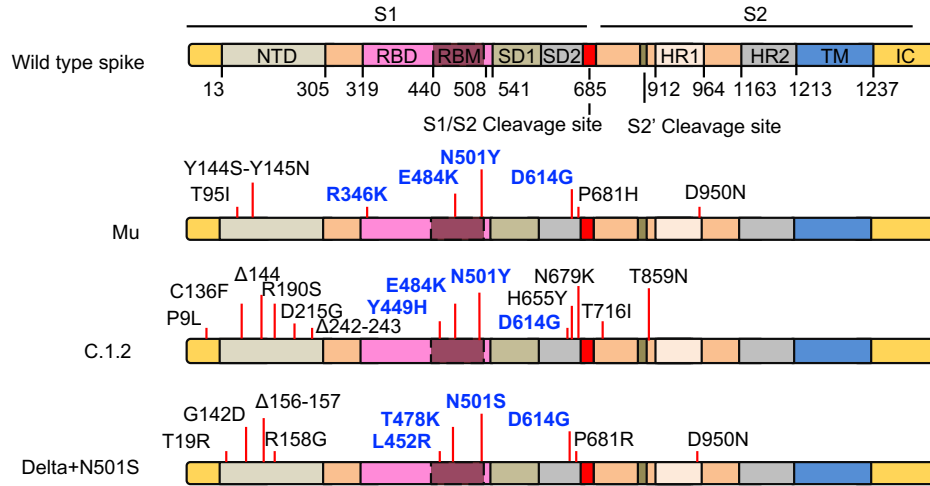**B**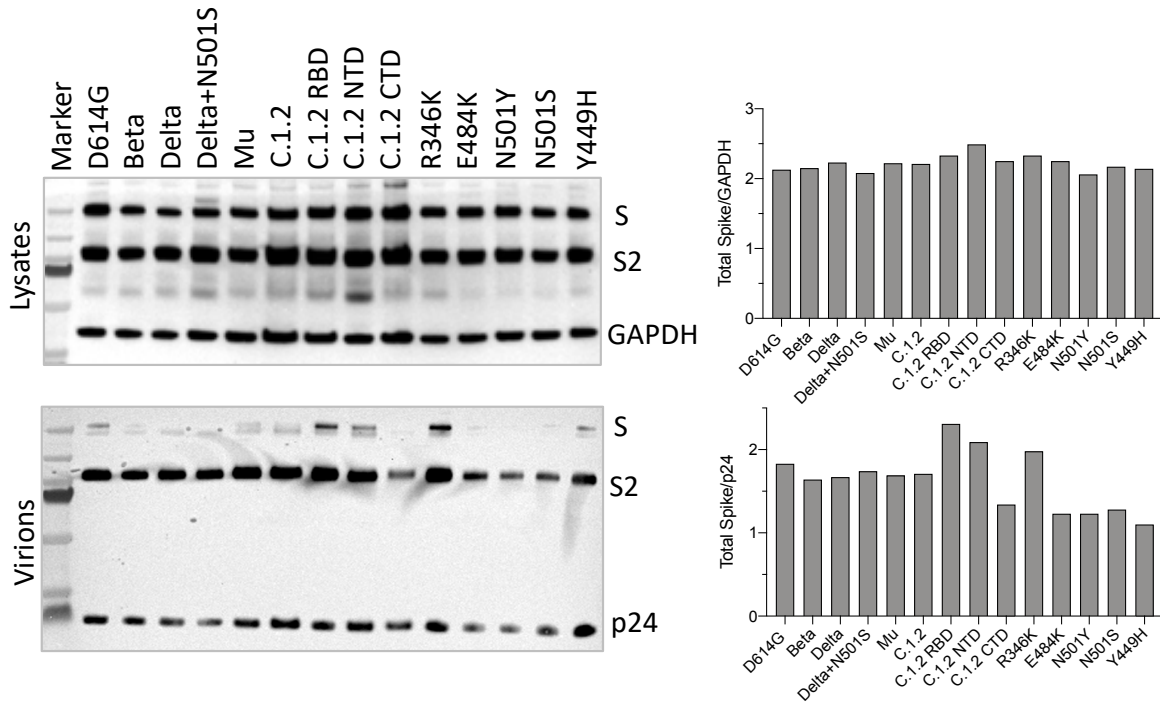**C**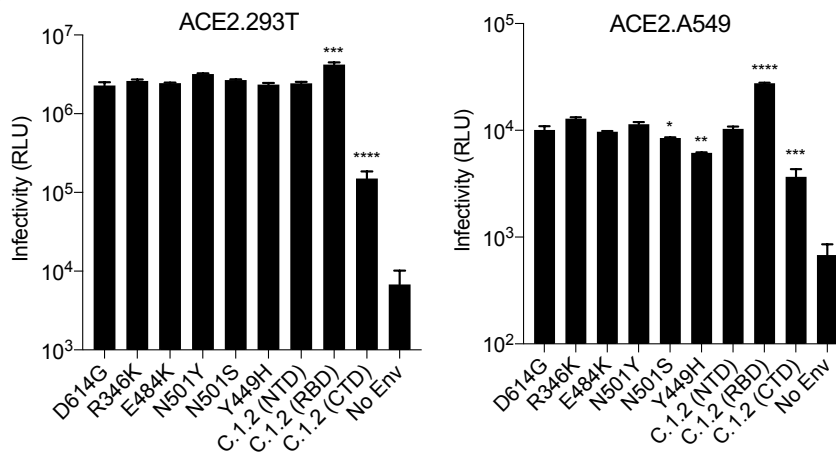**D**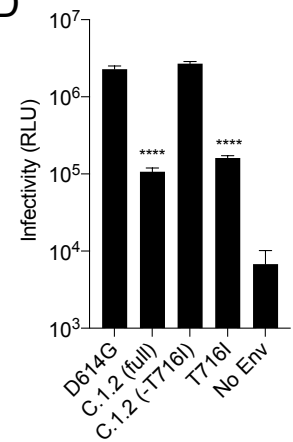

**Figure S1. Infectivity of variant spike viruses and spike expression levels. Related to Figure 1.**

(A) The domain structure of the SARS-CoV-2 spikes of Mu (B.1.621), C.1.2 and Delta+N501S is diagrammed. NTD, N-terminal domain; RBD, receptor-binding domain; RBM, receptor-binding motif; SD1 subdomain 1; SD2, subdomain 2; HR1, heptad repeat 1; HR2, heptad repeat 2; TM, transmembrane region; IC, intracellular domain.

(B) Immunoblot analysis of the variant spike proteins in transfected 293T cells. Pseudotyped viruses were produced by transfection of 293T cells. Two days post-transfection, virions were analyzed on an immunoblot probed with anti-spike antibody and anti-HIV-1 p24. The cell lysates were probed with anti-spike antibody and anti-GAPDH antibodies as a loading control. Spike expression levels were quantified and normalized by either GAPDH or p24, Total spike/loading control ratio were shown in the bar chart.

(C) Infectivity of virus pseudotyped by Beta, Delta, Delta+N501S, Mu, C.1.2 variant individual spikes pseudotyped lentivirus in ACE2.293T and ACE2.A549 cells.

(D) Infectivity of virus pseudotyped by C.1.2 (full), C.1.2. (-T716I) variant spikes and T716I variant individual spike pseudotyped lentivirus in ACE2.293T cells. The experiment was done twice with similar results.

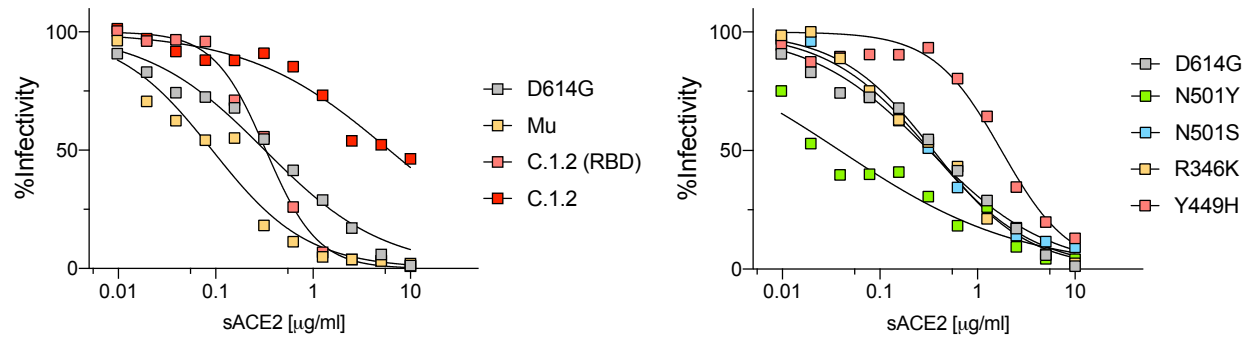

| IC50 (sACE2; µg/ml) |      |             |       |       |       |       |       |
|---------------------|------|-------------|-------|-------|-------|-------|-------|
| D614G               | Mu   | C.1.2 (RBD) | C.1.2 | R346K | H449H | N501Y | N501S |
| 0.32                | 0.09 | 0.33        | 6.08  | 0.35  | 1.76  | 0.04  | 0.33  |

**Figure S2. Neutralization of spike protein variants by sACE2. Related to Figure 3.**

Serially diluted sACE2 was mixed with variant pseudotypes (D614G, Mu, C.1.2) (left) and single point mutated virus (N501Y, N501S, R346K, Y449H) (right) for 30 minutes. The mixture was added on ACE2.293T cells. After 2 days of infection, luciferase activity was measured. The experiment was done three times with similar results.

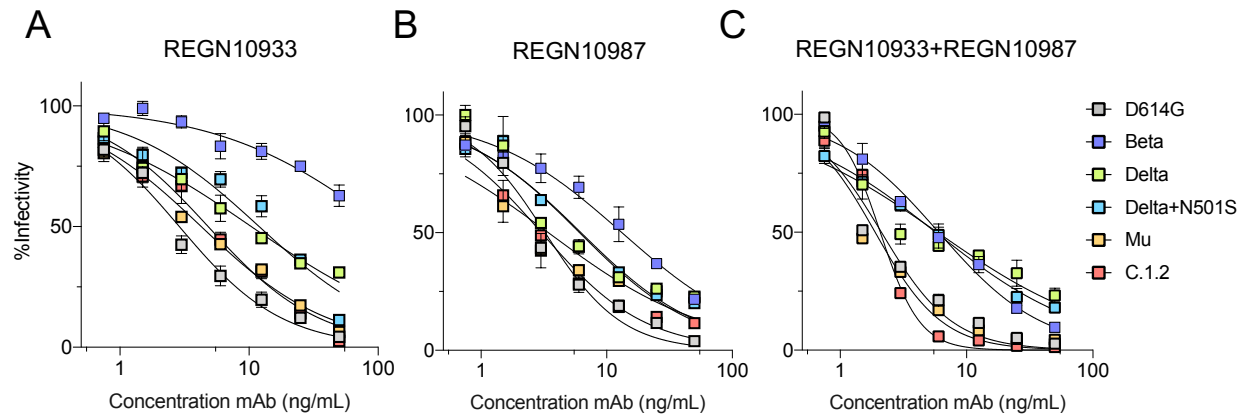

|           | IC50 (ng/ml) |       |       |             |     |       |
|-----------|--------------|-------|-------|-------------|-----|-------|
|           | D614G        | Beta  | Delta | Delta+N501S | Mu  | C.1.2 |
| REGN10933 | 2.9          | 112.5 | 10.4  | 12.0        | 4.3 | 4.8   |
| REGN10987 | 3.2          | 13.2  | 6.1   | 6.2         | 3.4 | 3.0   |
| REGN-COV2 | 2.1          | 6.0   | 5.9   | 5.7         | 1.9 | 2.1   |

**Figure S3. Neutralization of spike protein variants by monoclonal antibodies REGN10933 and REGN10987. Related to Figure 2.**

(A-C) Neutralization of D614G, Beta, Delta, Delta+N501S, Mu, C.1.2 variant spikes by REGN10933 and REGN10987. Neutralization of viruses by REGN10933 (A), REGN10987 (B), and 1:1 mixture of REGN10933 and REGN10987 (C) was measured. IC50 of REGN10933 (Beta) was calculated as estimated value. The table shows the calculated IC50 for each curve. The experiment was done three times with similar results.

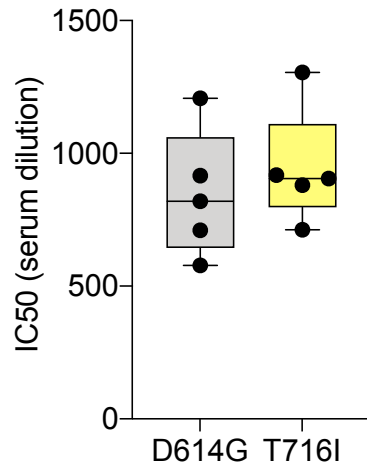

**Figure S4. Neutralization of T716I spike pseudotyped viruses by antibodies elicited by BNT162b2. Related to Figure 2.**

Neutralization of D614G and T716I spikes serum samples from BNT162b2 vaccinated individuals (n=5) was tested. The serum was collected at 7 days after vaccination. Each dot represents the IC50 for a single donor.

**Table S1. Related to Figure 2.** IC<sub>50</sub> of Convalescent, BNT162b2, mRNA-1273 and Ad26.COVS elicited antibodies against viruses with variant spike proteins. Age, Sex and Comorbidities are shown.

| <b>Convalescent</b>               |             |                |                   |              |              |         |
|-----------------------------------|-------------|----------------|-------------------|--------------|--------------|---------|
| IC <sub>50</sub> (serum dilution) |             |                |                   |              |              |         |
| donor                             | D614G (B.1) | Beta (B.1.351) | Delta (B.1.617.2) | Delta +N501S | Mu (B.1.621) | C.1.2   |
| 1                                 | 239         | 72             | 52                | 96           | 25           | 17      |
| 2                                 | 167         | 97             | 77                | 92           | 61           | 10      |
| 3                                 | 74          | 74             | 167               | 171          | 143          | 61      |
| 4                                 | 394         | 39             | 48                | 56           | 85           | 41      |
| 5                                 | 583         | 61             | 98                | 59           | 59           | 27      |
| 6                                 | 369         | 131            | 62                | 105          | 161          | 92      |
| 7                                 | 503         | 107            | 106               | 66           | 12           | 54      |
| 8                                 | 345         | 25             | 83                | 77           | 19           | 40      |
| Mean (SD)                         | 334 (169)   | 76 (35)        | 87 (38)           | 90 (37)      | 71 (56)      | 43 (26) |

| <b>BNT162b2</b>                   |                                |        |     |                           |           |           |           |              |          |           |
|-----------------------------------|--------------------------------|--------|-----|---------------------------|-----------|-----------|-----------|--------------|----------|-----------|
| IC <sub>50</sub> (serum dilution) |                                |        |     |                           |           |           |           |              |          |           |
| donor                             | Days post 2 <sup>nd</sup> dose | Age    | Sex | Comorbidities             | D614G     | Beta      | Delta     | Delta +N501S | Mu       | C.1.2     |
| 1                                 | 84                             | 39     | F   | None                      | 740       | 98        | 219       | 283          | 86       | 99        |
| 2                                 | 52                             | 23     | F   | None                      | 1713      | 119       | 451       | 636          | 96       | 77        |
| 3                                 | 101                            | 26     | F   | Asthma                    | 1320      | 399       | 543       | 412          | 273      | 315       |
| 4                                 | 109                            | 33     | F   | None                      | 738       | 205       | 393       | 325          | 199      | 127       |
| 5                                 | 60                             | 35     | F   | Hypothyroidism, Psoriasis | 1308      | 80        | 113       | 88           | 49       | 46        |
| 6                                 | 81                             | 42     | F   | Asthma                    | 374       | 62        | 72        | 109          | 0        | 0         |
| 7                                 | 108                            | 26     | F   | None                      | 694       | 369       | 148       | 126          | 269      | 271       |
| 8                                 | 107                            | 24     | M   | None                      | 389       | 166       | 131       | 130          | 55       | 0         |
| 9                                 | 110                            | 35     | M   | None                      | 485       | 112       | 238       | 209          | 119      | 46        |
| Mean (SD)                         | 90 (22)                        | 31 (7) |     |                           | 862 (474) | 179 (124) | 256 (167) | 257 (180)    | 127 (98) | 109 (112) |

| mRNA-1273 |                                |     |     |               |                                   |           |           |              |          |          |
|-----------|--------------------------------|-----|-----|---------------|-----------------------------------|-----------|-----------|--------------|----------|----------|
| donor     | Days post 2 <sup>nd</sup> dose | Age | Sex | Comorbidities | IC <sub>50</sub> (serum dilution) |           |           |              |          |          |
|           |                                |     |     |               | D614G                             | Beta      | Delta     | Delta +N501S | Mu       | C.1.2    |
| 1         | 89                             | 26  | M   | None          | 1378                              | 188       | 296       | 557          | 198      | 111      |
| 2         | 92                             | 53  | M   | None          | 1379                              | 390       | 358       | 390          | 254      | 124      |
| 3         | 61                             | 67  | M   | Prediabetes   | 1053                              | 100       | 122       | 407          | 251      | 97       |
| 4         | 93                             | 33  | F   | None          | 570                               | 60        | 296       | 135          | 0        | 0        |
| 5         | 44                             | 32  | M   | None          | 1162                              | 447       | 325       | 553          | 255      | 191      |
| 6         | 100                            | 29  | F   | None          | 1355                              | 516       | 481       | 524          | 148      | 0        |
| 7         | 52                             | 33  | F   | None          | 1426                              | 228       | 500       | 328          | 187      | 122      |
| 8         | 105                            | 55  | F   | Asthma        | 656                               | 394       | 286       | 262          | 253      | 151      |
| Mean (SD) | 80 (24)                        | 41  |     |               | 1122 (339)                        | 290 (169) | 333 (119) | 394 (150)    | 193 (88) | 100 (68) |

| Ad26.COVS.S |                                |         |     |               |                                   |         |         |              |         |         |
|-------------|--------------------------------|---------|-----|---------------|-----------------------------------|---------|---------|--------------|---------|---------|
| donor       | Days post 2 <sup>nd</sup> dose | Age     | Sex | Comorbidities | IC <sub>50</sub> (serum dilution) |         |         |              |         |         |
|             |                                |         |     |               | D614G                             | Beta    | Delta   | Delta +N501S | Mu      | C.1.2   |
| 1           | 57                             | 42      | F   | None          | 47                                | 58      | 43      | 32           | 54      | 14      |
| 2           | 58                             | 28      | F   | None          | 138                               | 38      | 49      | 97           | 48      | 58      |
| 3           | 66                             | 36      | F   | None          | 521                               | ND      | ND      | ND           | 48      | ND      |
| 4           | 92                             | 33      | F   | None          | 344                               | 18      | 36      | 29           | ND      | ND      |
| 5           | 87                             | 39      | F   | Prediabetes   | 253                               | ND      | 45      | 107          | ND      | ND      |
| 6           | 72                             | 32      | M   | None          | 280                               | 61      | 61      | 26           | ND      | ND      |
| 7           | 92                             | 39      | F   | None          | 260                               | 52      | 55      | 95           | 42      | 17      |
| 8           | 71                             | 75      | F   | None          | 304                               | 57      | 82      | 87           | 8       | ND      |
| 9           | 105                            | 30      | M   | None          | 58                                | 6       | 76      | 48           | 52      | 51      |
| 10          | 115                            | 33      | F   | None          | 487                               | 48      | 55      | 79           | ND      | ND      |
| Mean (SD)   | 82 (20)                        | 39 (13) |     |               | 245 (180)                         | 32 (25) | 50 (23) | 58 (37)      | 28 (25) | 16 (22) |



**Table 2. Related to Figure 2.** IC50 of sera from uninfected and previously infected individuals before and after vaccination with BNT162b2 against viruses with variant spike proteins. Age, Sex and Comorbidities are shown.

| <b>Uninfected BNT162b2</b>                                                                          |                                |         |        |               |                                                      |           |           |              |           |             |              |
|-----------------------------------------------------------------------------------------------------|--------------------------------|---------|--------|---------------|------------------------------------------------------|-----------|-----------|--------------|-----------|-------------|--------------|
| Note: Uninfected samples had no detectable levels of antibodies against variants before vaccination |                                |         |        |               |                                                      |           |           |              |           |             |              |
| donor                                                                                               | Days post 2 <sup>nd</sup> dose | Age     | Sex    | Comorbidities | IC <sub>50</sub> (serum dilution) (post vaccination) |           |           |              |           |             |              |
|                                                                                                     |                                |         |        |               | D614G                                                | Beta      | Delta     | Delta +N501S | Mu        | C.1.2 (RBD) | C.1.2 (full) |
| 1                                                                                                   | 8                              | 62      | Male   | none          | 1824                                                 | 285       | 882       | 871          | 141       | 136         | 80           |
| 2                                                                                                   | 8                              | 34      | Male   | none          | 1307                                                 | 171       | 802       | 825          | 267       | 322         | 0            |
| 3                                                                                                   | 8                              | 40      | Female | none          | 1109                                                 | 287       | 804       | 687          | 221       | 141         | 93           |
| 4                                                                                                   | 8                              | 39      | Female | none          | 713                                                  | 120       | 251       | 317          | 0         | 251         | 110          |
| 5                                                                                                   | 9                              | 39      | Male   | none          | 481                                                  | 0         | 201       | 341          | 0         | 0           | 107          |
| Mean (SD)                                                                                           | 8.2 (0.4)                      | 43 (11) |        |               | 1087 (524)                                           | 173 (121) | 588 (332) | 608 (264)    | 126 (123) | 170 (123)   | 78 (45)      |

| <b>Previously infected BNT162b2</b> |                                |         |     |                                                                  |                                   |             |         |             |          |             |              |             |         |            |         |            |              |           |
|-------------------------------------|--------------------------------|---------|-----|------------------------------------------------------------------|-----------------------------------|-------------|---------|-------------|----------|-------------|--------------|-------------|---------|------------|---------|------------|--------------|-----------|
| donor                               | Days post 2 <sup>nd</sup> dose | Age     | Sex | Comorbidities                                                    | IC <sub>50</sub> (serum dilution) |             |         |             |          |             |              |             |         |            |         |            |              |           |
|                                     |                                |         |     |                                                                  | D614G                             |             | Beta    |             | Delta    |             | Delta +N501S |             | Mu      |            | C.1.2   |            | C.1.2 (full) |           |
|                                     |                                |         |     |                                                                  | Before                            | After       | Before  | After       | Before   | After       | Before       | After       | Before  | After      | Before  | After      | Before       | After     |
| 1                                   | 10                             | 34      | M   | none                                                             | 66                                | 5477        | 107     | 2462        | 129      | 1957        | 165          | 2157        | 31      | 755        | 69      | 1660       | 29           | 838       |
| 2                                   | 11                             | 46      | M   | none                                                             | 163                               | 7844        | 51      | 3183        | 171      | 4964        | 192          | 4157        | 17      | 2118       | 71      | 2585       | 3            | 660       |
| 3                                   | 7                              | 60      | M   | none                                                             | 287                               | 3852        | 129     | 3133        | 125      | 3823        | 120          | 5268        | 76      | 2501       | 184     | 1731       | 53           | 807       |
| 4                                   | 9                              | 42      | F   | none                                                             | 470                               | 2179        | 40      | 853         | 90       | 652         | 86           | 752         | 62      | 570        | 0       | 939        | 0            | 863       |
| 5                                   | 12                             | 43      | M   | none                                                             | 237                               | 1829        | 51      | 1421        | 79       | 1539        | 111          | 979         | 0       | 1247       | 61      | 771        | 0            | 311       |
| 6                                   | 8                              | 37      | F   | none                                                             | 236                               | 2760        | 89      | 3299        | 112      | 4007        | 105          | 4488        | 63      | 1029       | 94      | 668        | 61           | 696       |
| 7                                   | 10                             | 54      | F   | Hypertension, History of obesity                                 | 156                               | 2101        | 125     | 2246        | 148      | 1178        | 168          | 794         | 23      | 1051       | 105     | 461        | 12           | 468       |
| 8                                   | 7                              | 34      | F   | none                                                             | 220                               | 1739        | 72      | 1368        | 141      | 1218        | 199          | 1592        | 11      | 1080       | 98      | 454        | 0            | 468       |
| 9                                   | 7                              | 32      | F   | Anemia, Asthma, GERD                                             | 54                                | 1970        | 74      | 667         | 86       | 1025        | 107          | 797         | 88      | 453        | 0       | 437        | 22           | 471       |
| 10                                  | 11                             | 24      | F   | none                                                             | 179                               | 2412        | 109     | 1793        | 114      | 2485        | 93           | 2027        | 20      | 577        | 15      | 771        | 13           | 785       |
| 11                                  | 10                             | 49      | F   | Hypertension, Rhinosinusitis                                     | 126                               | 1343        | 133     | 591         | 135      | 1742        | 127          | 2395        | 35      | 651        | 9       | 610        | 5            | 618       |
| 12                                  | 6                              | 44      | F   | Hereditary Hemorrhagic Telangiectasias, Eosinophilic Esophagitis | 51                                | 2664        | 125     | 993         | 82       | 1754        | 98           | 1783        | 28      | 921        | 0       | 1357       | 0            | 1388      |
| Mean (SD)                           | 9 (2)                          | 42 (11) |     |                                                                  | 187 (118)                         | 3014 (1885) | 92 (34) | 1834 (1008) | 118 (29) | 2195 (1359) | 131 (39)     | 2266 (1554) | 38 (28) | 1079 (629) | 59 (57) | 1037 (665) | 17 (21)      | 698 (279) |
